# Supplementary material
Source: PubMed Central journal article supplement (PMC2815645)

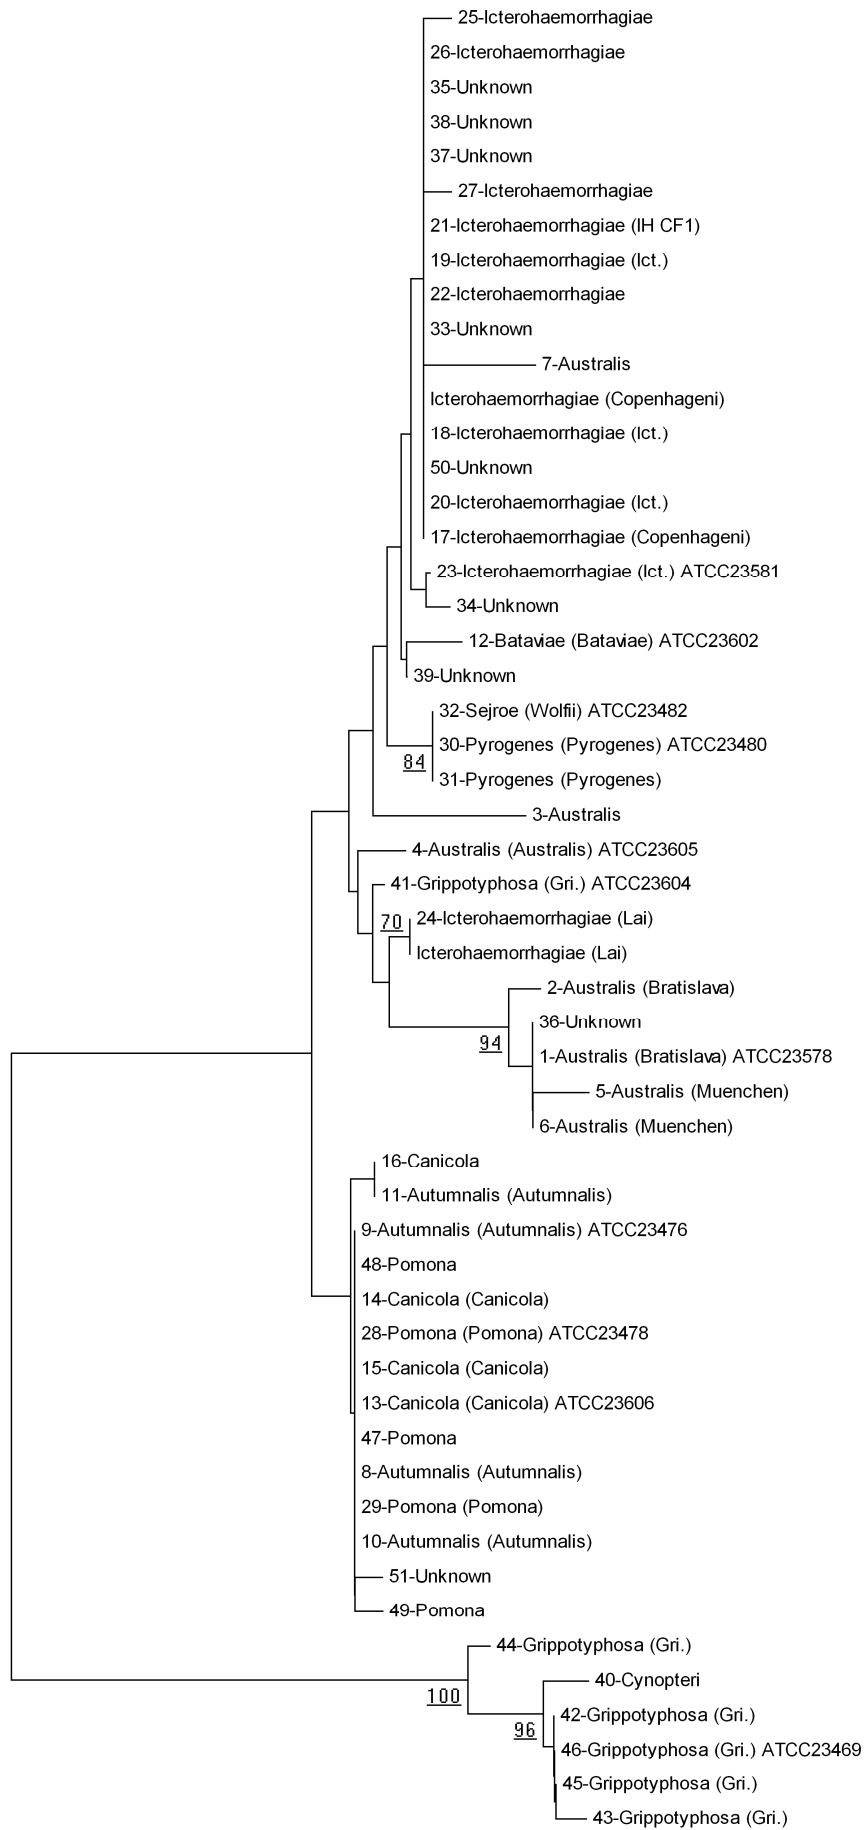

0.01

Supplement: supp_48_2_581__1.pdf [file supp_48_2_581__1.pdf]

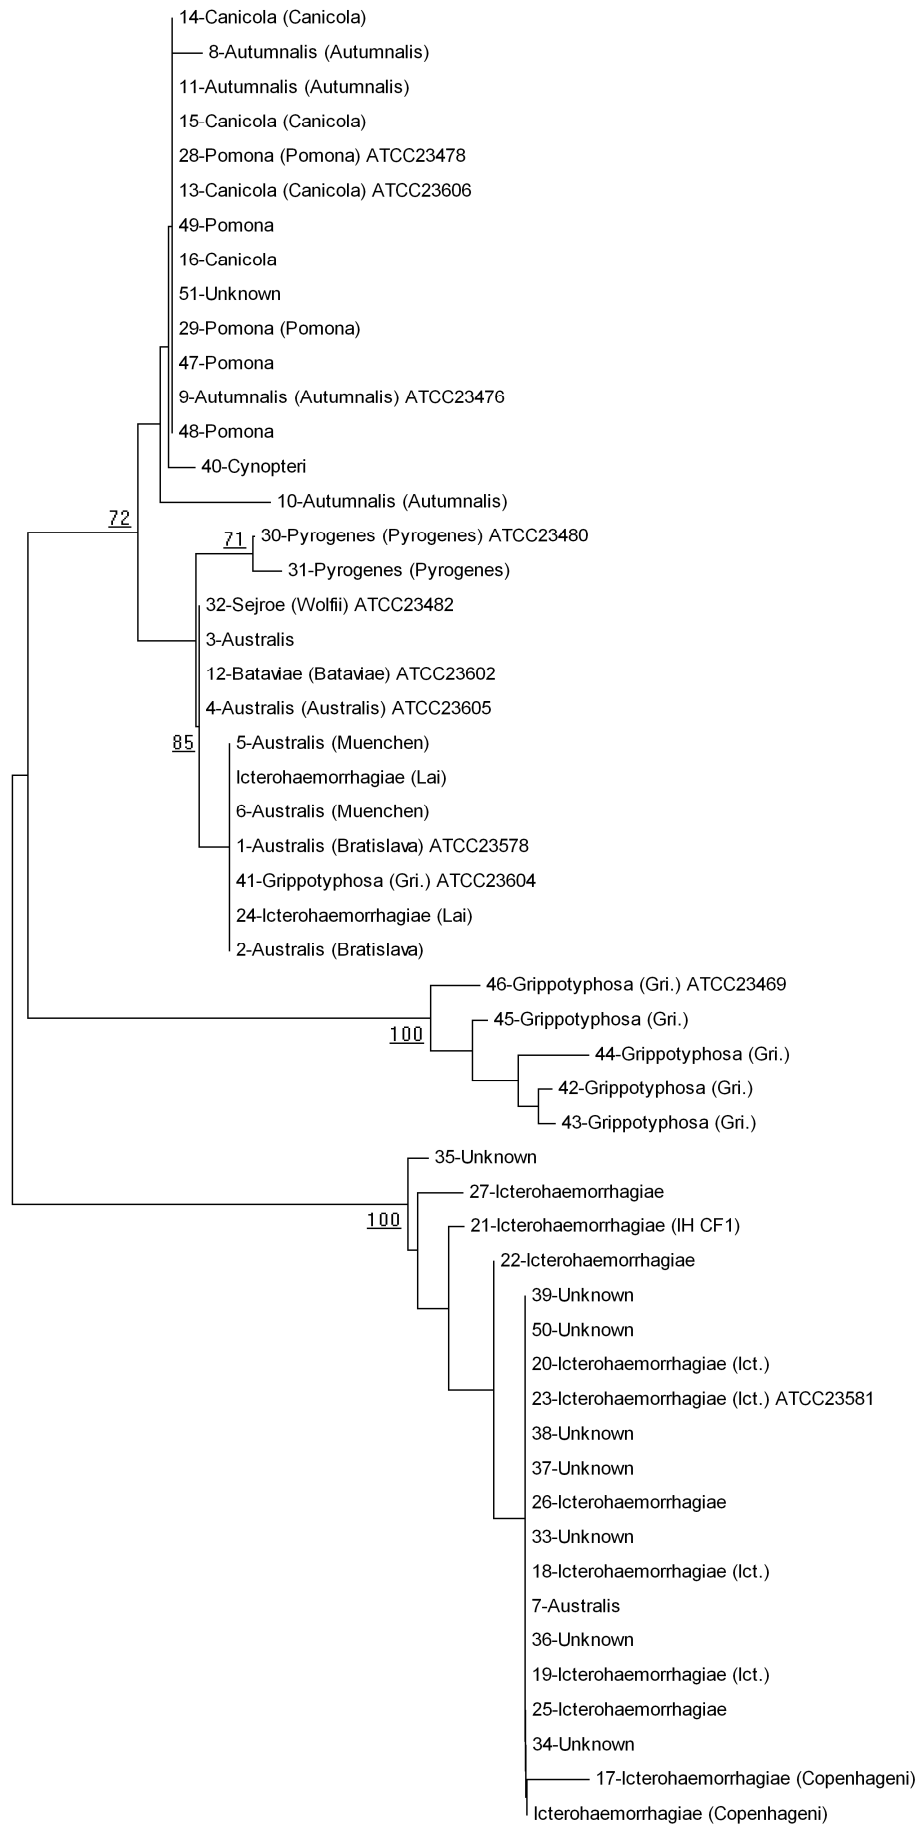

0,01

Supplement: supp_48_2_581__2.pdf [file supp_48_2_581__2.pdf]

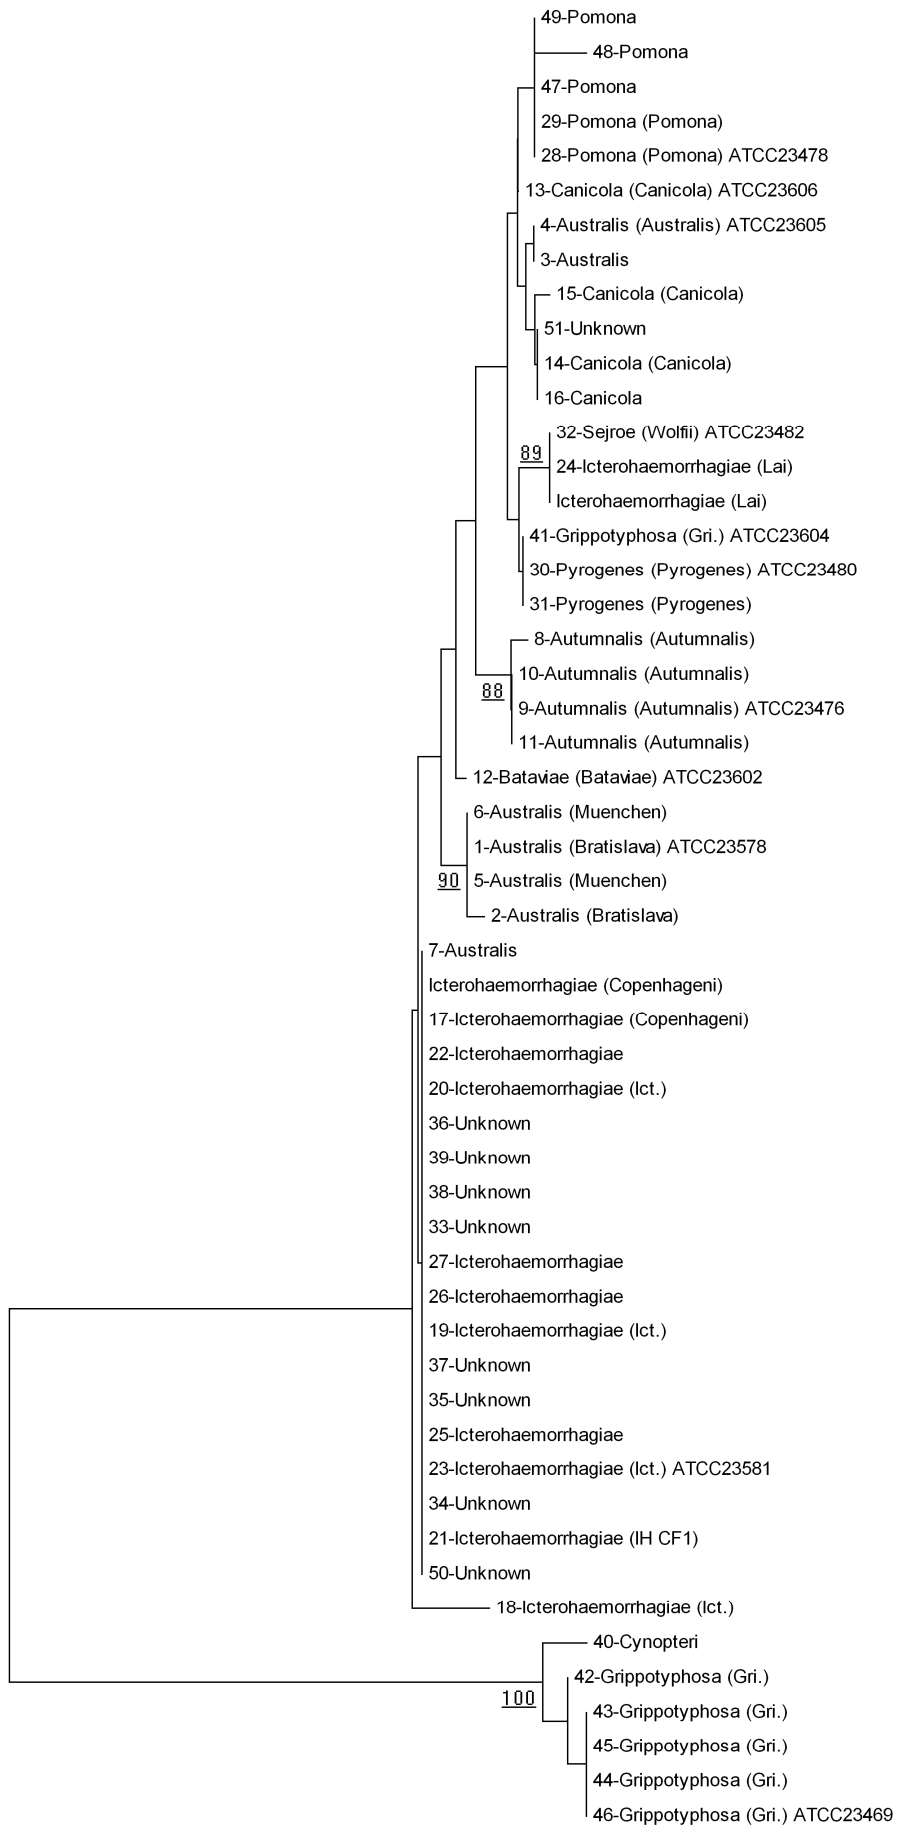

0.01

Supplement: supp_48_2_581__3.pdf [file supp_48_2_581__3.pdf]

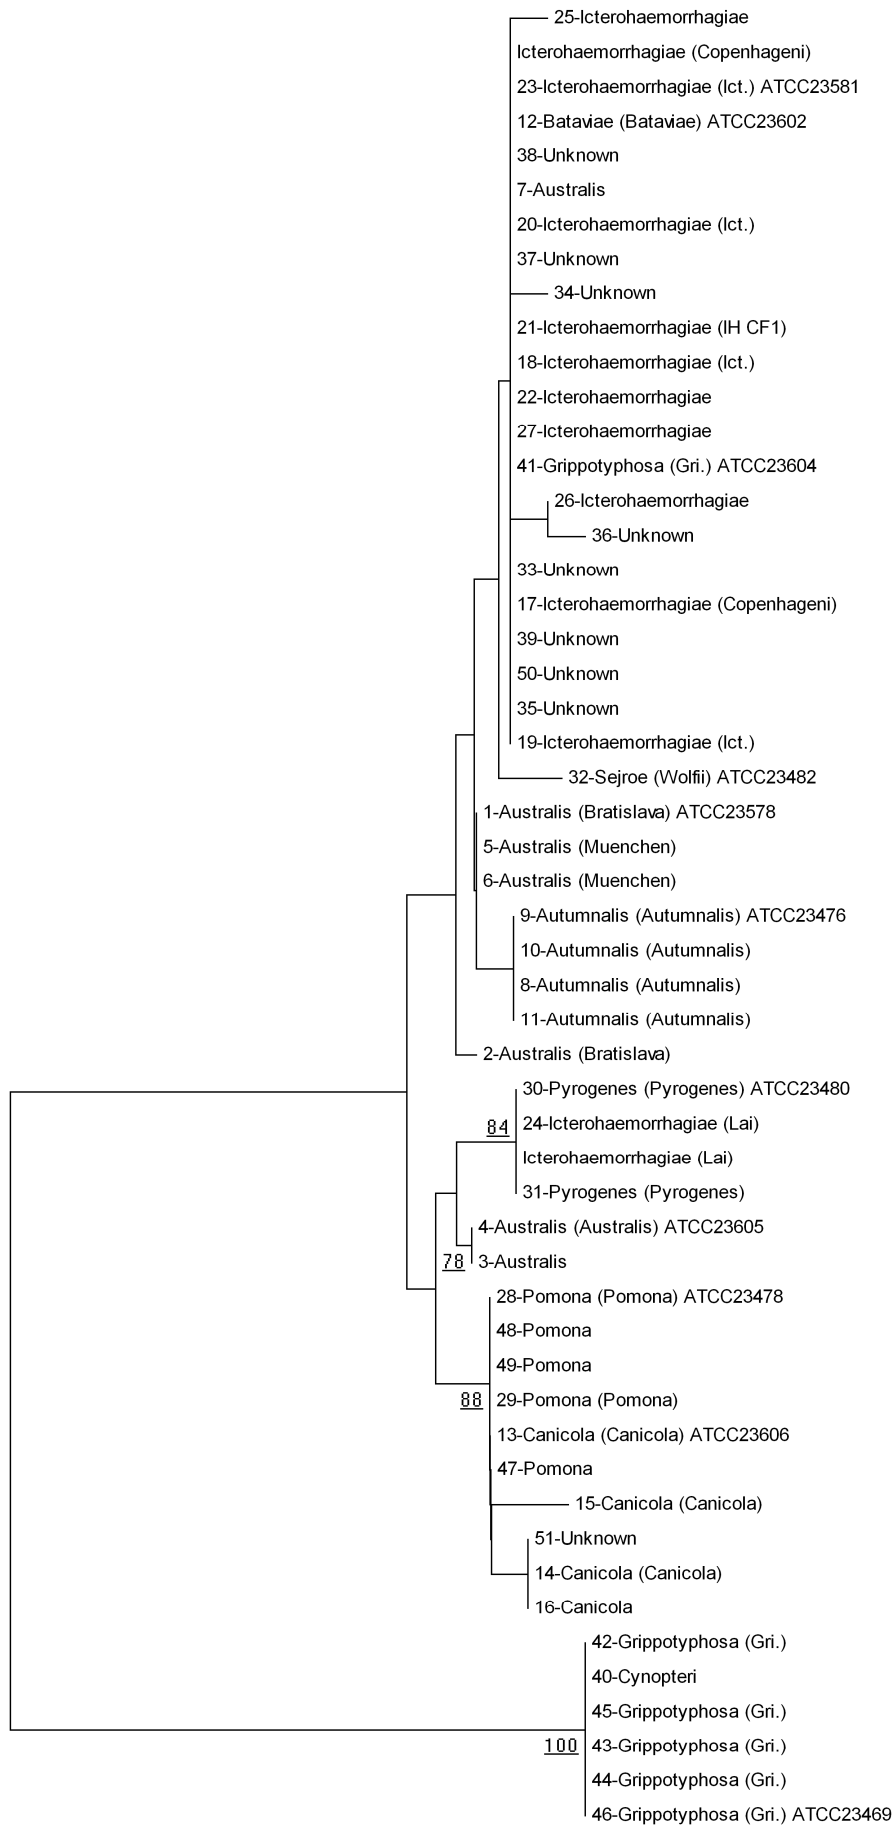

0.005

Supplement: supp_48_2_581__4.pdf [file supp_48_2_581__4.pdf]

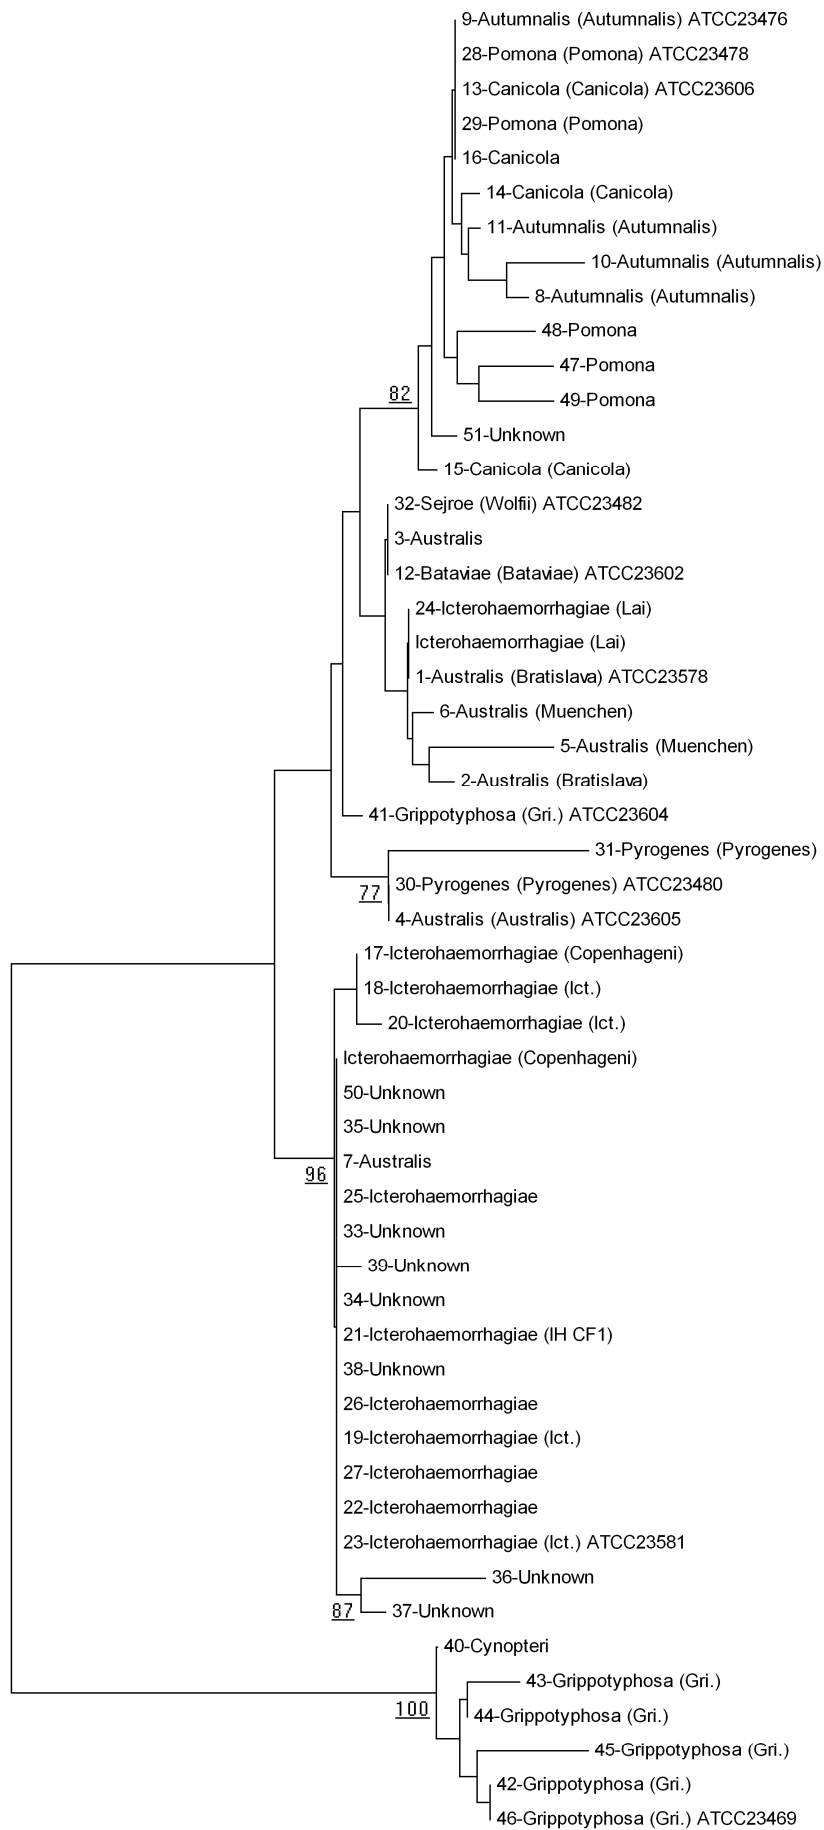

0.005

Supplement: supp_48_2_581__5.pdf [file supp_48_2_581__5.pdf]

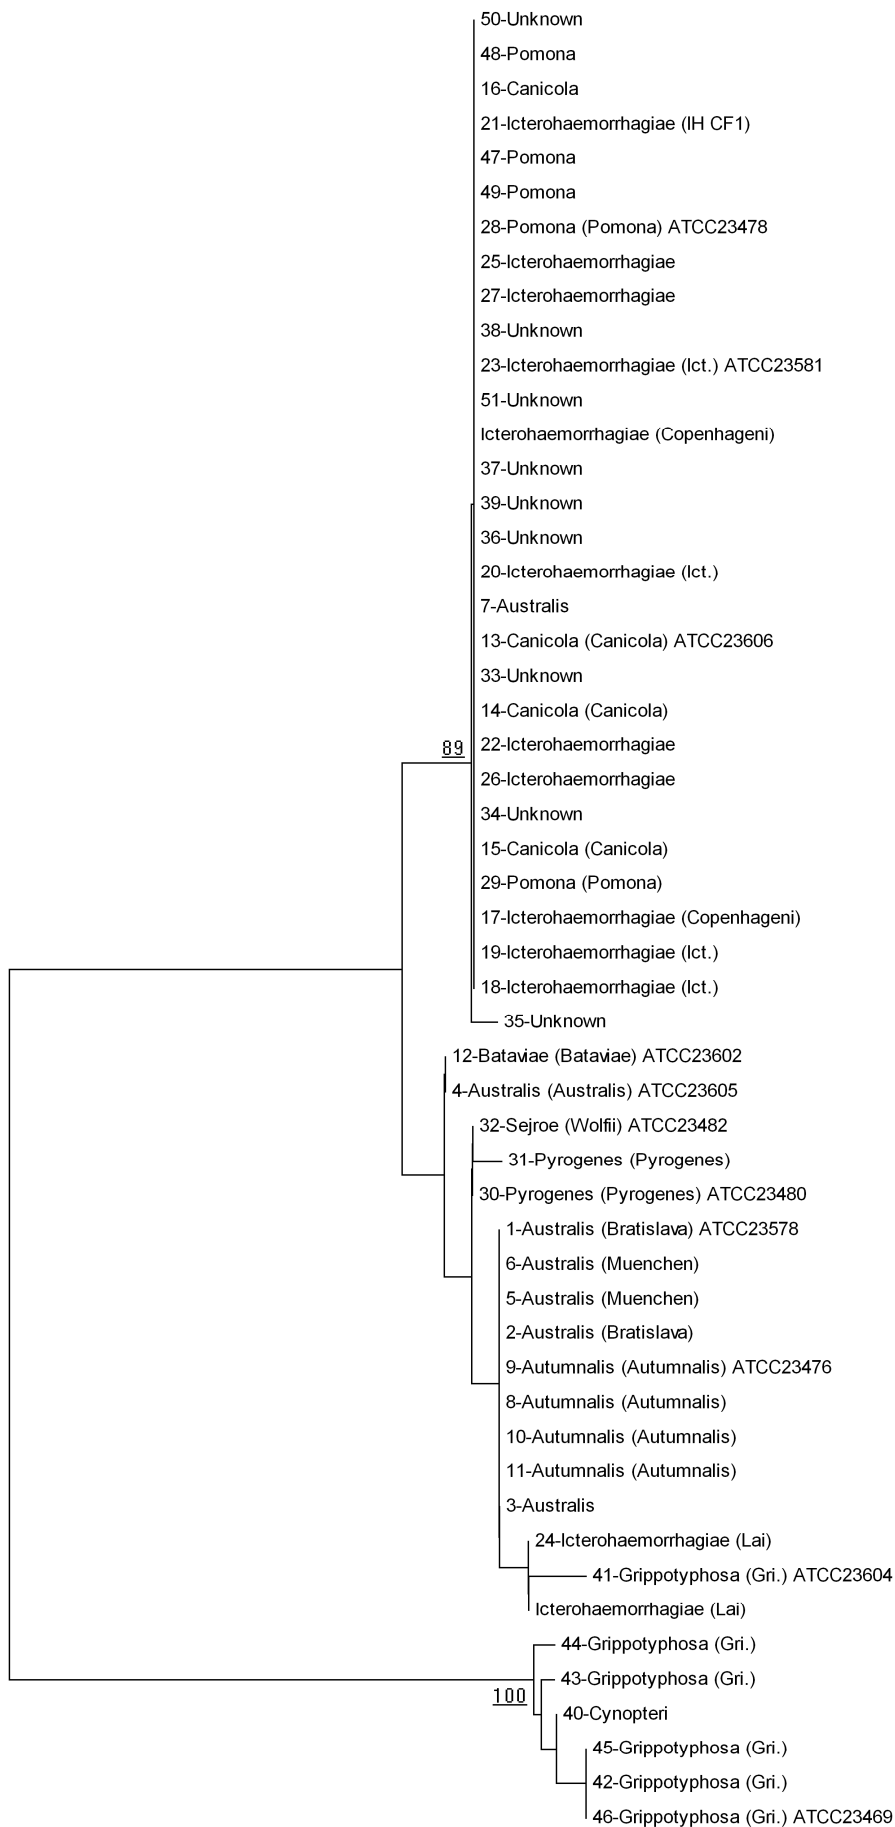

Supplement: supp_48_2_581__6.pdf [file supp_48_2_581__6.pdf]

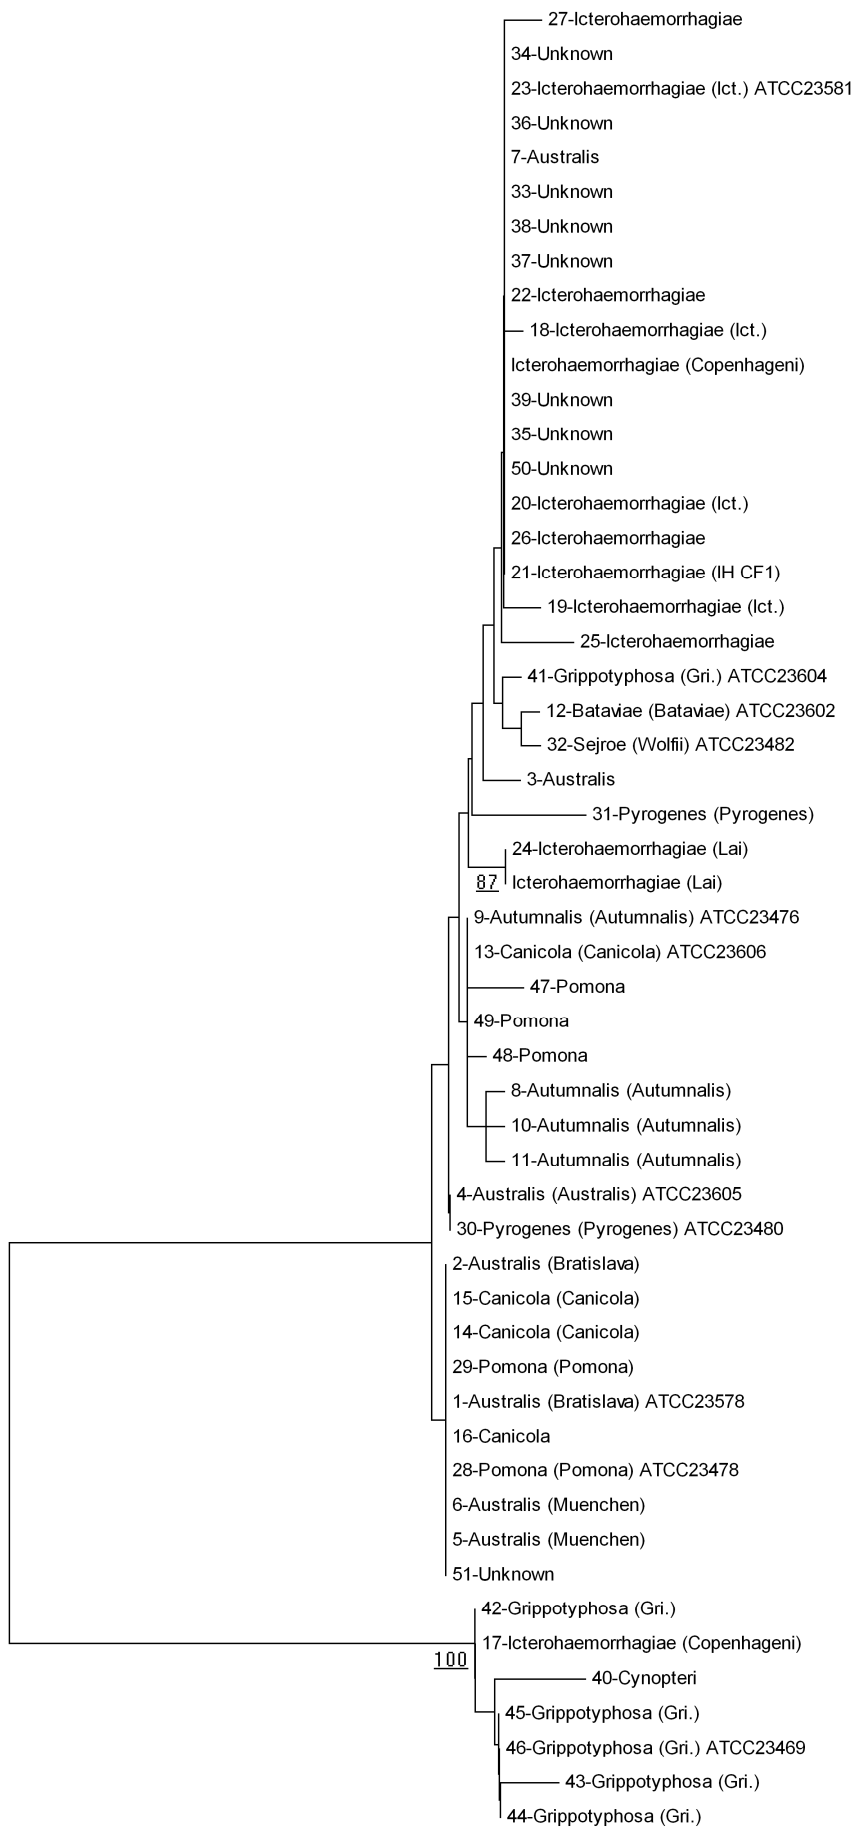

Supplement: supp_48_2_581__7.pdf [file supp_48_2_581__7.pdf]
